# Supplementary material for: HLA-DQ2 and -DQ8 signatures of gluten T cell epitopes in celiac disease
Source: JCI journal article supplement (doi:10.1172/jci27620), 2006-07-29
Supplement: sd1 [file 1]

Figure S1

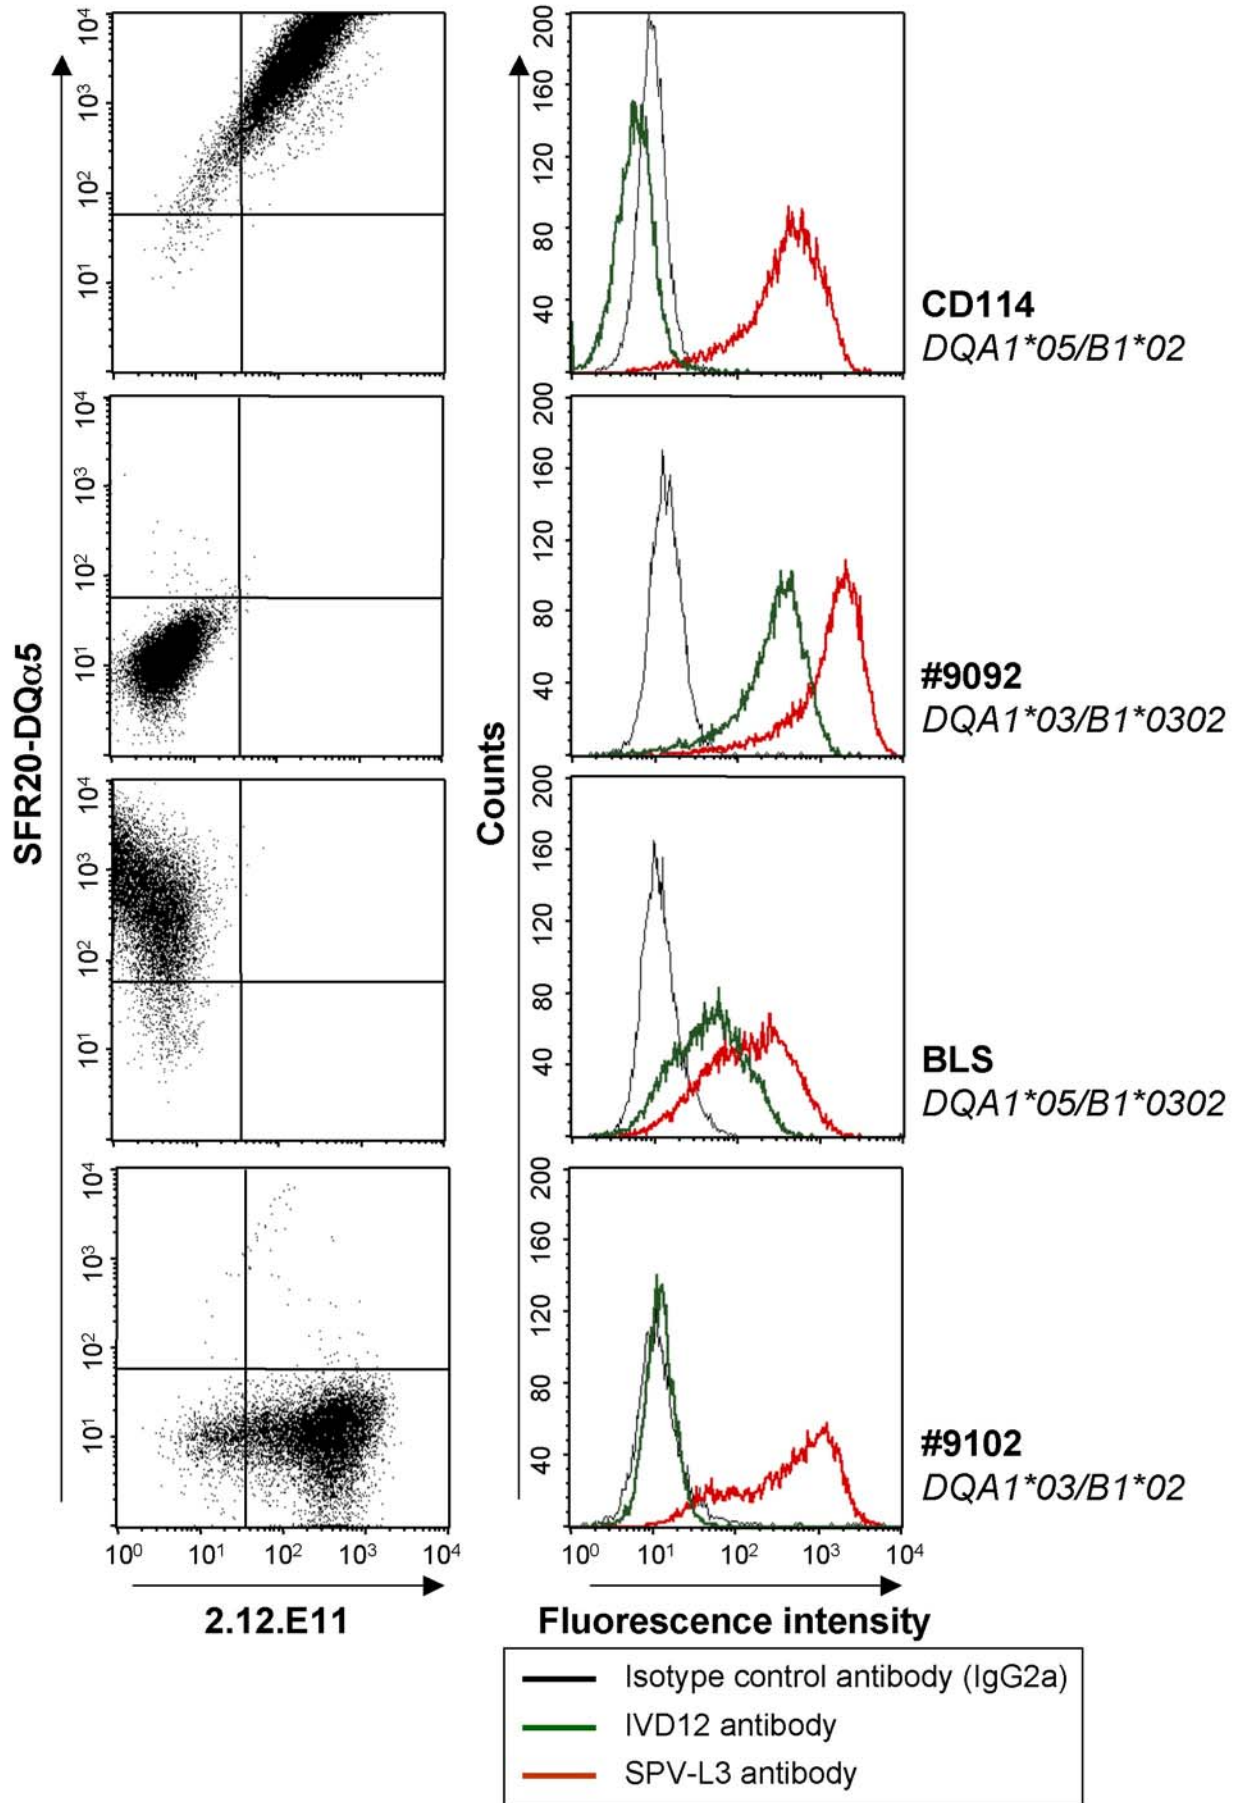

### ***Figure legend supplemental data***

**Figure S1 Flowcytometric analysis of HLA-DQ expression by B-lymphoblastoid cells.** The expression of HLA-DQ molecules was tested at the time of the T-cell assay described in Figure 7 to analyze for purity of cell populations and the level of surface DQ expression. The following mAbs were used: 2.12.E11 (specific for DQ $\beta$ 1\*02), SFR20-DQ $\alpha$ 5 (specific for DQ $\alpha$ 1\*04/05/06), IVD12 (specific for DQ $\beta$ 1\*03) and SPV-L3 (specific for pan DQ). Staining for isotype control mAb is shown for IgG2a. The isotype control IgG1 gave even weaker signal (not shown).
